# Supplementary material for: MiR-34a-5p Inhibits Proliferation, Migration, Invasion and Epithelial-mesenchymal Transition in Esophageal Squamous Cell Carcinoma by Targeting LEF1 and Inactivation of the Hippo-YAP1/TAZ Signaling Pathway
Source: PubMed Central journal article supplement (PMC7086260; doi:10.7150/jca.39861), 2020-03-04

Supplement Fig. S1

a

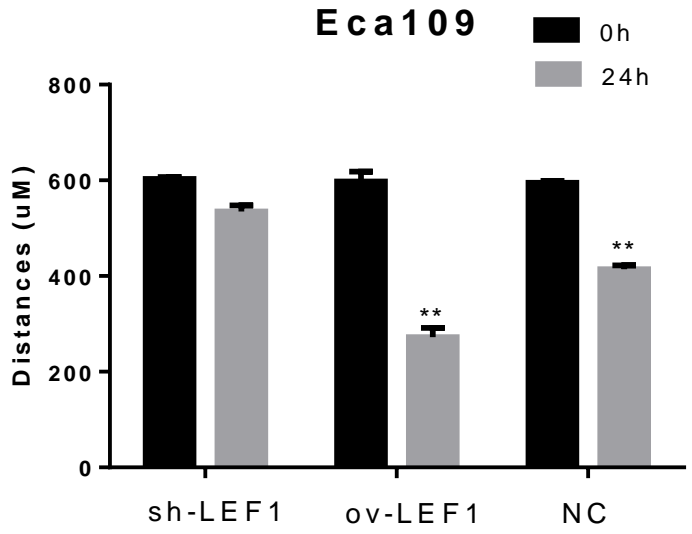

b

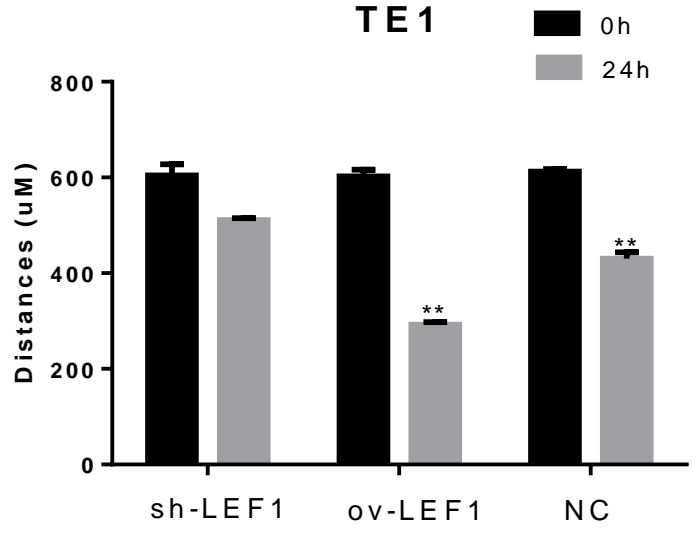

c

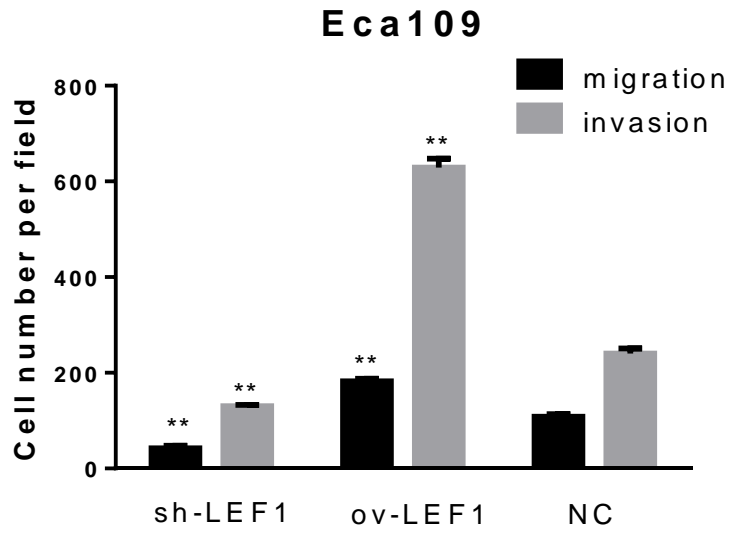

d

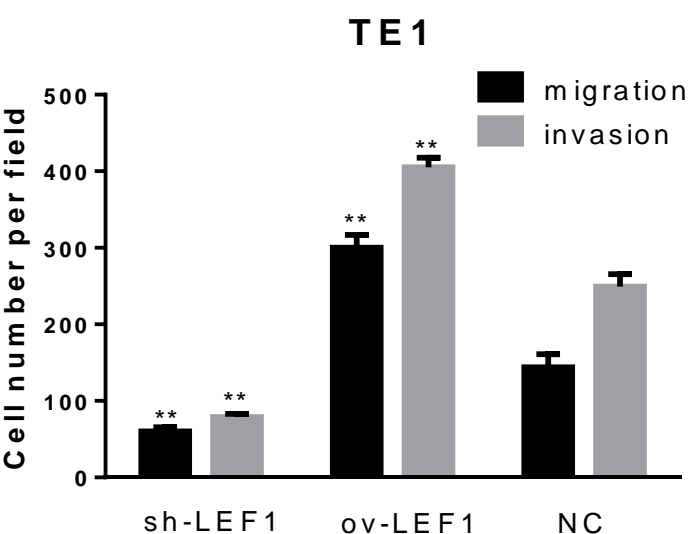

## Supplement Fig. S2

| Gene Name            | MicroRNA                       | StemLoop ID   | miRanda | miRDB | miRWalk | PICTAR4 | PICTAR5 | Targetscan | SUM |
|----------------------|--------------------------------|---------------|---------|-------|---------|---------|---------|------------|-----|
| <a href="#">LEF1</a> | <a href="#">hsa-miR-302b</a>   | hsa-mir-302b  | 1       | 1     | 1       | 1       | 1       | 1          | 6   |
| <a href="#">LEF1</a> | <a href="#">hsa-miR-34a</a>    | hsa-mir-34a   | 1       | 1     | 1       | 1       | 1       | 1          | 6   |
| <a href="#">LEF1</a> | <a href="#">hsa-miR-34c-5p</a> | hsa-mir-34c   | 1       | 1     | 1       | 1       | 1       | 1          | 6   |
| <a href="#">LEF1</a> | <a href="#">hsa-miR-302c</a>   | hsa-mir-302c  | 1       | 1     | 1       | 0       | 1       | 1          | 5   |
| <a href="#">LEF1</a> | <a href="#">hsa-miR-302d</a>   | hsa-mir-302d  | 1       | 1     | 1       | 1       | 0       | 1          | 5   |
| <a href="#">LEF1</a> | <a href="#">hsa-miR-26a</a>    | hsa-mir-26a-1 | 1       | 0     | 1       | 1       | 1       | 1          | 5   |
| <a href="#">LEF1</a> | <a href="#">hsa-miR-302a</a>   | hsa-mir-302a  | 1       | 0     | 1       | 1       | 1       | 1          | 5   |
| <a href="#">LEF1</a> | <a href="#">hsa-miR-26b</a>    | hsa-mir-26b   | 1       | 0     | 1       | 1       | 1       | 1          | 5   |
| <a href="#">LEF1</a> | <a href="#">hsa-miR-372</a>    | hsa-mir-372   | 1       | 1     | 1       | 1       | 0       | 1          | 5   |
| <a href="#">LEF1</a> | <a href="#">hsa-miR-26a</a>    | hsa-mir-26a-2 | 1       | 0     | 1       | 1       | 1       | 1          | 5   |

Supplement Fig. S3

a

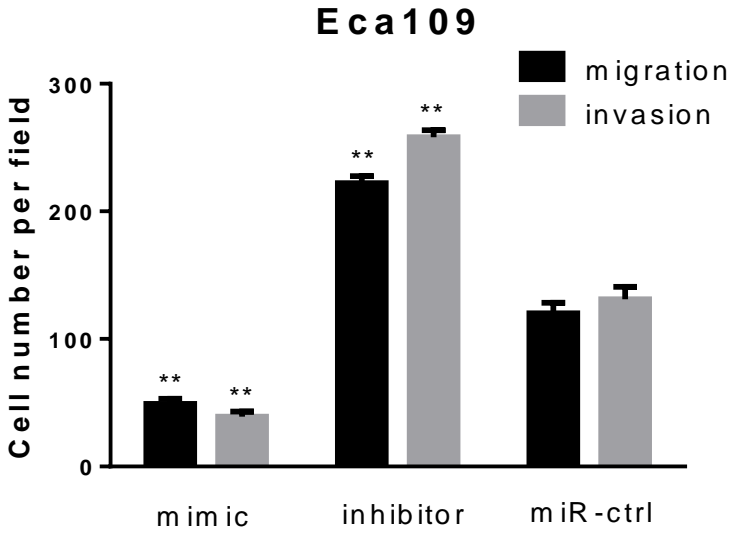

b

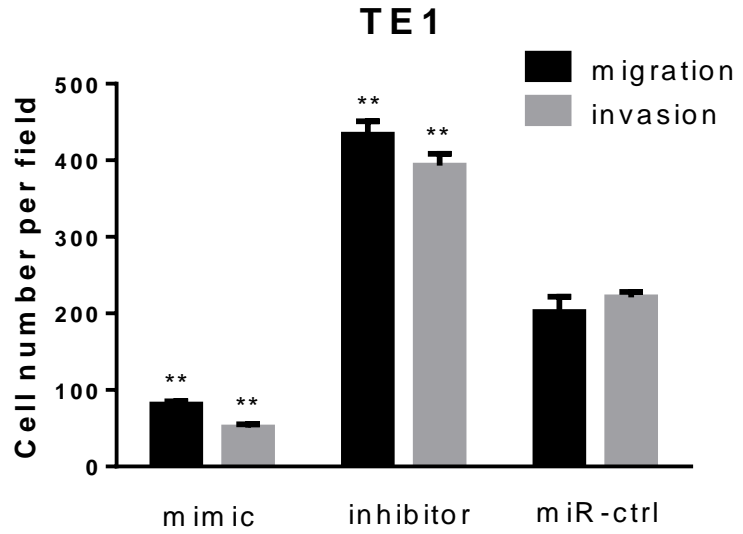

c

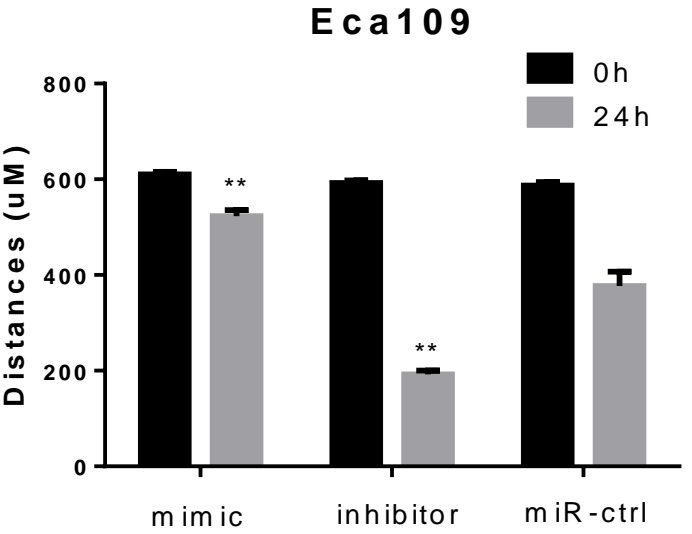

d

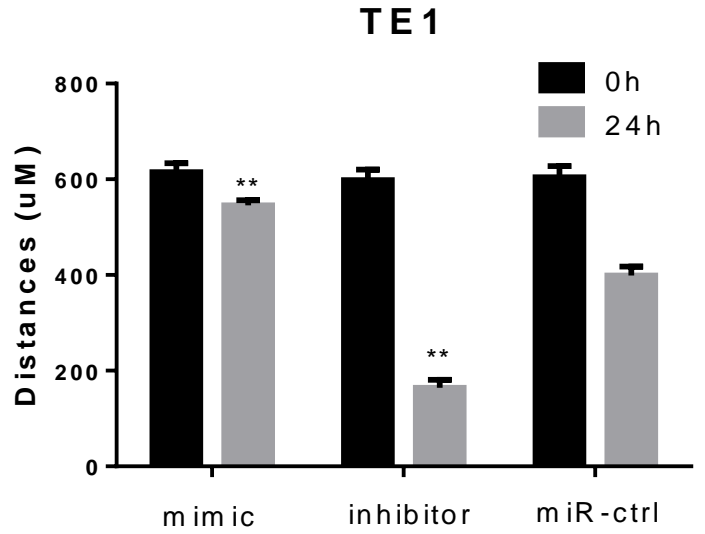

Supplement: jcav11p3072s1.pdf [file jcav11p3072s1.pdf]
